# Supplementary material for: Knowing your neighbourhood—the effects of Epichloë endophytes on foliar fungal assemblages in perennial ryegrass in dependence of season and land-use intensity
Source: PeerJ. 2018 May 15;6:e4660. doi: 10.7717/peerj.4660 (PMC5958879; doi:10.7717/peerj.4660)
Supplement: Table S1 — Table includes total OTU reads per each L. perenne sample, location/region, Epichloë infection state and taxonomic detail to the single OTUs. [file peerj-06-4660-s001.xlsx]

## Sheet: OTU matrix_read counts
REGION	PLOT_ID	SAMPLE_ID	SEASON	EPICHLOE_INF	OTU1	OTU2	OTU3	OTU4	OTU5	OTU6	OTU7	OTU8	OTU9	OTU10	OTU11	OTU12	OTU13	OTU14	OTU15	OTU16	OTU17	OTU18	OTU19	OTU20	OTU21	OTU22	OTU23	OTU24	OTU25	OTU26	OTU27	OTU28	OTU29	OTU30	OTU31	OTU32	OTU33	OTU34	OTU35	OTU36	OTU37	OTU38	OTU39	OTU40	OTU41	OTU42	OTU43	OTU44	OTU45
Alb	AEG 01	A151-01-33	spring	yes	3	10	1	2	150	1	55	1	474	2	487	0	0	17	0	0	1	0	0	244	0	0	0	0	0	0	0	0	0	0	0	2	0	0	1	1	0	498	0	0	0	1	0	0	166
Alb	AEG 01	A151-01-25	spring	no	2125	326	2923	1	1158	0	3996	99	5101	281	634	1892	40	9621	1	67	0	1	210	74	0	46	5	0	407	43	0	0	109	1	51	0	0	0	1	0	0	535	98	1007	0	0	0	125	0
Alb	AEG 02	A152-02-28	summer	yes	4899	1928	202	75	2945	7194	2698	274	104	471	299	0	282	363	0	922	0	0	147	0	0	45	104	0	200	0	1055	0	0	0	0	0	1	533	0	0	0	0	92	0	0	1	1424	0	0
Alb	AEG 02	A152-02-26	summer	no	11856	626	4331	57	811	400	4381	1769	1033	979	3620	25	480	1131	2	2353	0	909	568	0	0	68	275	0	126	41	123	0	0	0	0	45	2	165	0	0	73	207	1	91	947	0	0	0	0
Alb	AEG 05	A151-05-09	spring	yes	733	0	0	431	243	744	1912	3	5352	0	93	3515	0	2430	0	164	0	89	0	1199	0	230	4	1	1	0	0	0	0	0	0	0	0	0	0	0	0	0	0	0	653	1	0	316	0
Alb	AEG 05	A152-05-12	summer	yes	6816	988	1205	81	3673	657	2933	171	110	382	1346	148	147	549	1	968	180	1611	188	12	0	62	1248	0	294	243	80	5	4	38	0	132	0	437	1	0	87	482	16	1375	914	0	4	1	48
Alb	AEG 05	A151-05-21	spring	no	2776	124	5150	206	1261	0	3015	20	7439	176	4079	1519	893	2410	0	814	446	139	0	2818	0	1245	208	0	109	23	127	0	1	105	0	0	1	0	0	0	74	575	0	718	469	1	20	137	323
Alb	AEG 05	A152-05-15	summer	no	8562	2098	10042	1218	3290	2309	3619	510	627	1642	1960	22	15	203	1	2754	0	11	247	37	0	225	275	0	9	2	333	1	2	122	0	9	0	2244	26	0	2	1651	18	824	10	15	14	0	0
Alb	AEG 06	A151-06-36	spring	yes	6319	3	2932	1	1	0	0	1	1455	0	1	1	5322	588	0	0	1	0	0	0	0	4027	0	0	0	0	1	0	0	0	0	1	0	0	2	0	0	0	0	0	1	0	0	0	0
Alb	AEG 06	A151-06-37	spring	no	964	324	0	1	0	0	2861	4116	11817	0	2090	1509	1353	5951	0	0	3383	2280	0	1928	0	7020	0	0	0	706	0	0	5282	1	1348	0	1380	0	0	0	0	0	0	378	309	0	0	0	0
Alb	AEG 15	A151-15-02	spring	yes	0	4	1	2	0	0	1	1	0	0	0	0	0	334	0	2	0	0	1	0	0	249	0	0	0	0	0	0	0	0	0	0	0	0	0	0	0	0	171	0	0	0	0	91	0
Alb	AEG 15	A151-15-1	spring	no	331	1798	1	3	608	1	2	0	554	1	282	2847	0	706	0	3	1	0	0	0	0	0	1	0	1	0	0	0	2	0	0	0	0	0	0	2	1	0	121	1	0	0	0	239	0
Alb	AEG 16	A152-16-03	summer	yes	1223	915	6362	1	624	0	825	101	157	83	694	44	1	223	0	65	142	560	1	3	4	70	75	4	42	1375	0	0	0	0	0	0	0	1	0	0	545	1	307	2	337	0	0	92	1629
Alb	AEG 16	A152-16-1	summer	no	2529	3591	3205	269	1563	6010	3698	2180	92	2446	1423	62	351	263	20	4558	41	4999	218	23	0	387	824	0	409	752	1056	0	0	21	46	165	0	234	10	1	289	1149	104	199	1148	7	38	0	0
Alb	AEG 18	A152-18-13	summer	no	8368	4698	4753	224	3415	1720	4500	937	1	264	1297	597	0	358	0	1234	1	1	74	0	0	0	448	0	997	327	740	0	0	0	29	0	206	314	0	0	0	1534	584	1512	605	0	0	0	0
Alb	AEG 20	A152-20-02	summer	yes	3144	1019	1377	327	608	1124	1965	611	136	264	556	56	0	3110	0	96	3448	42	634	0	1	30	390	1	540	2205	0	0	0	0	1	94	144	629	16	18	296	95	1563	1	308	0	18	53	3387
Alb	AEG 20	A152-20-1	summer	no	11553	702	3520	1397	248	236	1466	1510	326	74	1328	49	59	478	66	202	219	140	456	30	0	145	108	0	77	130	111	0	1	0	0	288	1	216	0	0	556	101	78	146	736	32	26	95	305
Alb	AEG 21	A151-21-31	spring	yes	4	1814	1	1	1	0	2471	2	6953	0	0	0	0	1	0	0	0	1	1	0	0	1	0	0	0	1	0	0	0	0	1	0	0	0	0	0	0	0	1099	0	0	0	0	0	0
Alb	AEG 21	A151-21-35	spring	no	681	2	0	326	0	0	684	0	1	3	0	4501	0	158	0	0	0	0	2	0	0	0	151	0	0	0	0	0	310	0	0	0	0	0	343	0	0	2	795	0	0	0	0	0	0
Alb	AEG 23	A151-23-22	spring	yes	325	64	2	24	66	2	1245	32	5534	1003	1	6191	2	1890	0	0	2396	1	3	2220	0	1	2	0	46	1	171	0	0	0	0	0	1	0	0	0	0	159	46	2	725	0	1	0	0
Alb	AEG 23	A151-23-32	spring	no	207	4	0	0	1	1	2676	0	1959	0	278	9621	0	1141	1	1	708	0	1	2509	0	0	1	0	0	0	0	2	0	1	0	0	0	0	0	0	0	0	1	1	388	0	0	0	0
Alb	AEG 28	A151-28-02	spring	yes	1987	10	364	199	52	3	2592	44	271	413	628	2501	12	2929	120	34	5341	0	0	3928	0	1451	3	0	56	0	1	0	0	389	0	1	0	0	0	0	0	482	0	92	0	0	0	2241	1
Alb	AEG 28	A152-28-10	summer	yes	2013	741	15	4324	14	5467	3305	248	7	1712	2	2	0	6	77	3935	24	0	246	735	0	3	1	0	243	0	233	7	0	9	0	69	108	725	8	20	0	293	67	171	1	0	1	0	14
Alb	AEG 28	A151-28-3	spring	no	819	4	391	303	164	0	181	0	281	0	42	2629	1	84	0	1	936	0	103	234	0	208	0	0	539	77	0	1	6	1	132	0	0	0	0	0	0	183	35	2	0	0	0	6794	1
Alb	AEG 28	A152-28-4	summer	no	11207	1289	41	1293	104	5543	9510	572	207	3247	44	0	1	299	11	3814	80	72	38	642	0	42	0	0	205	0	378	0	0	26	0	898	1010	2149	31	0	0	986	118	822	0	4	0	118	0
Alb	AEG 33	A152-33-17	summer	yes	2974	1189	75	118	213	9807	1530	3156	0	1852	20	1	0	0	0	569	48	548	3	78	0	1	0	0	1	0	1711	0	0	0	0	127	54	3026	21	111	42	499	0	0	0	0	0	0	0
Alb	AEG 33	A152-33-14	summer	no	14985	12469	30	62	84	11475	6496	201	0	2108	0	0	0	0	0	1225	0	1	0	0	0	0	1	0	0	2	532	0	0	1674	1	265	51	4901	160	97	0	2102	86	26	0	0	0	0	0
Alb	AEG 35	A151-35-01	spring	yes	15335	293	1244	775	1832	1	3545	0	634	2	0	403	0	650	0	3	553	2	0	832	2	348	0	2	1582	0	1	563	0	0	0	0	0	0	0	0	0	0	477	0	0	0	0	2	0
Alb	AEG 35	A151-35-3	spring	no	2753	164	1342	4447	445	3	2965	1038	1346	2477	860	0	503	557	911	0	296	433	0	706	4	2	0	0	0	2	0	0	0	0	0	0	0	1	0	0	0	0	307	1688	681	0	0	0	0
Alb	AEG 39	A151-39-24	spring	yes	226	0	0	1	373	0	1745	341	2618	1	539	405	1	855	0	0	0	1	0	0	0	0	0	0	157	0	2	0	0	0	0	1	0	1	0	0	0	0	72	0	2	0	1	845	0
Alb	AEG 39	A152-39-02	summer	yes	9732	1254	824	201	4425	2050	2820	331	354	508	1171	0	6	40	0	3643	0	1	189	0	0	151	838	9	27	5	144	0	0	0	0	352	7	509	0	0	34	771	0	646	328	0	0	0	0
Alb	AEG 39	A151-39-23	spring	no	1448	68	182	0	514	1	1416	2	3197	0	1176	8245	56	667	2	0	357	1	0	55	0	161	19	0	148	0	0	648	82	141	0	0	0	0	1	0	0	0	209	0	113	0	0	626	67
Alb	AEG 40	A151-40-12	spring	yes	1254	21	90	711	0	0	382	27	362	205	17	18046	269	493	0	0	145	0	0	1659	0	284	0	0	0	0	0	0	198	0	0	1	0	0	0	0	0	0	0	0	89	0	0	0	0
Alb	AEG 40	A152-40-03	summer	yes	24766	18241	2261	1721	2244	1608	7803	3	3	2	5603	6	0	1	0	2646	0	0	1619	2	0	0	47	0	0	4734	0	1458	0	1	0	0	7983	2105	0	0	1	0	0	0	0	0	0	0	0
Alb	AEG 40	A151-40-3	spring	no	988	479	0	0	0	1	2218	0	1222	0	1	2865	0	1378	0	0	0	385	0	1829	0	317	0	0	0	0	1	0	0	0	0	0	0	0	0	0	0	0	0	1	0	0	0	0	0
Alb	AEG 40	A152-40-5	summer	no	6741	1170	3624	2	3507	422	7710	3228	121	257	674	435	599	343	0	164	341	420	1	234	0	1	1	0	29	227	1	162	1	131	441	0	170	0	0	0	1	450	447	2192	503	0	0	0	0
Alb	AEG 41	A152-41-04	summer	yes	35065	1638	12965	2	7454	3896	10277	0	1	728	4101	2	2297	8837	1	1	2637	619	0	1	0	0	1	0	1	9036	565	0	3	0	265	0	235	759	0	0	320	1227	1797	965	1284	0	0	4	2489
Alb	AEG 41	A152-41-5	summer	no	1497	1385	790	0	1666	2	2376	1	421	1	0	1141	3360	216	0	0	1	2	0	1	0	0	1	0	341	0	0	0	1	0	0	0	0	0	0	0	0	2	278	1	0	0	0	0	0
Alb	AEG 45	A151-45-04	spring	yes	1085	6	3	2005	4	14	1094	0	3767	1	3	3658	0	425	2	1251	0	0	2	0	0	681	0	0	0	0	0	1	0	0	0	0	1	1	0	1	0	0	0	0	0	0	0	0	0
Alb	AEG 45	A152-45-02	summer	yes	4108	1453	2621	53	2320	1361	695	1	321	131	952	122	0	575	0	361	1405	1031	346	0	0	0	62	0	82	859	0	0	1	1	196	0	122	0	0	1	683	366	929	0	0	0	0	0	542
Alb	AEG 45	A151-45-9	spring	no	1214	368	1041	3	564	0	2676	3	5360	1	1361	7710	253	704	0	174	675	321	405	0	0	493	91	0	125	2	0	1	98	0	1	108	0	0	266	99	0	169	74	0	215	1	0	103	0
Alb	AEG 45	A152-45-1	summer	no	11240	1423	4093	1004	2725	1373	2930	415	811	264	1353	204	351	1492	0	1845	1735	513	294	67	0	46	235	0	570	736	258	0	170	1	101	0	25	248	1	2	321	367	338	1562	1286	0	1	24	76
Alb	AEG 46	A151-46-21	spring	yes	1665	242	2	1	395	0	9606	38	8941	459	836	961	1	1072	0	141	1	1	0	261	0	1116	37	27	0	0	0	0	0	0	0	0	0	0	0	0	1	0	0	149	318	0	1	0	546
Alb	AEG 46	A151-46-22	spring	no	1772	709	4	454	1375	167	2581	684	6465	750	725	297	515	649	2	1022	0	0	0	190	0	1	49	0	60	0	0	0	0	0	0	0	0	0	0	0	0	0	0	495	0	0	0	0	452
Alb	AEG 50	A152-50-03	summer	yes	19451	762	119	579	1037	85	4132	2007	445	84	2217	120	214	1618	0	1521	541	231	127	286	0	63	549	0	142	0	77	1	1	21	1193	0	1	118	0	0	70	172	24	952	1463	32	24	218	0
Alb	AEG 50	A152-50-8	summer	no	15771	1514	430	133	3169	1463	5999	506	63	987	1482	210	109	235	0	5765	22	59	215	8	0	139	713	0	222	16	148	0	0	7	86	21	4	113	19	0	134	1252	15	1200	2329	0	0	0	14
Hai	HEG 04	H151-04-13	spring	yes	16012	4555	0	1155	2535	50	1305	624	1079	334	2830	2	125	341	1	114	65	1	1031	388	0	1229	239	0	481	0	59	0	0	1746	0	11	0	0	13	0	0	354	49	38	0	0	5	16	0
Hai	HEG 04	H152-04-01	summer	yes	7914	8296	5670	1068	763	278	264	955	414	330	303	11	277	154	1966	20	341	194	83	1439	5	18	0	0	26	17	159	0	0	210	0	884	0	0	53	2437	1074	19	66	109	0	48	0	34	0
Hai	HEG 04	H151-04-10	spring	no	26541	9650	1054	2023	4600	306	667	1296	1	191	550	0	766	299	0	4	0	1	0	290	0	417	0	0	334	0	453	0	0	407	1	72	0	0	83	0	1	1	0	124	0	0	0	0	211
Hai	HEG 04	H152-04-2	summer	no	2165	16776	1231	117	192	2947	174	1099	37	138	328	34	40	360	1962	1	130	54	23	312	0	56	22	509	1	53	45	0	0	2	40	925	289	40	206	397	193	42	70	0	1	47	31	0	0
Hai	HEG 06	H151-06-05	spring	yes	17168	4028	0	3320	3382	470	2068	48	463	1568	2014	105	1041	334	0	105	0	0	250	0	0	212	184	0	1134	1	352	0	0	242	0	0	0	0	0	0	0	0	98	402	208	4	143	25	0
Hai	HEG 07	H151-07-15	spring	yes	16322	720	172	4715	190	67	3219	99	508	1930	1200	118	441	933	0	1	368	113	1361	207	0	0	23	0	145	0	92	1	135	230	0	19	18	0	26	0	4670	71	116	34	26	0	0	266	0
Hai	HEG 07	H151-07-20	spring	no	28143	1163	38	1113	947	57	2079	283	373	2484	2061	59	994	703	0	57	75	146	72	254	1	1	25	0	87	0	698	17	789	51	16	0	1	0	511	0	1284	156	68	91	0	0	0	1	1
Hai	HEG 12	H151-12-03	spring	yes	10740	3813	229	1633	1511	80	757	1335	308	791	4690	728	982	369	0	0	248	3	1786	1	1	2312	438	0	150	0	218	0	37	100	2	0	965	0	57	0	260	0	818	103	0	1	95	60	0
Hai	HEG 13	H152-13-14	summer	yes	6661	12845	4447	1691	450	1402	688	2243	51	1282	370	37	535	613	75	46	333	131	410	46	0	146	359	0	295	1082	158	115	0	134	0	1608	294	115	601	152	80	104	421	203	50	404	25	0	0
Hai	HEG 13	H152-13-10	summer	no	10183	4660	4193	3437	676	1781	189	585	17	1173	243	26	664	186	13	19	65	106	369	25	1	14	120	0	98	125	207	13	0	259	8	585	1254	12	245	0	1278	107	66	54	0	59	13	0	0
Hai	HEG 15	H151-15-13	spring	yes	8018	3864	18	5808	196	361	3003	318	218	1802	615	3170	339	1164	56	577	461	0	774	212	0	297	1	0	1090	0	1025	1554	0	0	6	247	3	0	0	0	0	117	3552	30	0	0	0	0	0
Hai	HEG 15	H152-15-01	summer	yes	1355	10972	670	1321	2088	457	3	3143	2	2	2	281	0	278	967	1	342	35	1000	0	0	0	1	326	0	0	417	1	0	0	1	1455	0	0	1338	240	0	0	217	101	0	163	0	0	0
Hai	HEG 15	H151-15-10	spring	no	11522	2146	595	2192	676	519	2028	0	192	2502	868	140	156	370	7775	124	0	0	1275	661	0	215	0	0	161	1	272	0	0	169	1834	0	1	2	243	0	0	270	66	93	0	0	77	0	0
Hai	HEG 15	H152-15-3	summer	no	2549	4393	1225	356	214	318	70	558	190	283	97	30	158	146	306	1	232	65	260	1	0	0	11	0	36	0	0	0	57	99	105	216	291	0	240	0	0	0	155	0	0	167	0	0	0
Hai	HEG 16	H151-16-03	spring	yes	4902	17158	0	533	670	0	287	883	261	178	968	131	374	127	1	0	240	331	587	692	0	571	1	0	0	0	0	0	454	1	0	0	1	0	2	0	0	1	0	394	0	765	0	0	0
Hai	HEG 16	H151-16-4	spring	no	7903	11724	558	2023	1148	263	1608	671	570	541	812	1340	743	1301	0	1	160	0	0	792	0	322	72	1	0	7	0	0	21	1	332	0	0	0	1102	0	0	0	82	632	0	950	118	1	106
Hai	HEG 24	H152-24-07	summer	yes	147	4060	4594	60	8	2	22	4836	3	9	15	611	120	1223	0	0	88	443	41	1	1	0	0	0	0	4807	1	0	0	3	27	24	3	0	2766	0	523	0	54	14	1	1892	0	1	0
Hai	HEG 24	H152-24-15	summer	no	1799	7473	150	299	1731	293	156	741	0	534	194	0	0	0	0	0	1	0	820	0	0	0	62	0	0	291	363	0	0	0	126	587	0	0	630	0	0	0	2	0	0	547	198	0	0
Hai	HEG 28	H151-28-04	spring	yes	16598	15445	872	8908	1105	668	596	772	545	2458	1007	2	0	140	0	1	476	752	1563	157	1	0	1	2	143	0	0	0	0	186	383	111	0	0	0	0	0	0	0	322	107	0	0	0	0
Hai	HEG 28	H151-28-8	spring	no	18893	2460	1	3303	1965	769	927	142	110	1501	4034	53	163	334	0	148	0	5	1699	79	0	0	0	442	1432	0	870	0	70	177	0	0	90	1	261	0	0	613	0	298	594	0	0	0	0
Hai	HEG 29	H151-29-04	spring	yes	6521	442	0	8605	385	1	1972	171	59	1666	201	1	1008	1506	0	58	135	266	942	157	3214	18	5	0	434	351	39	0	1	76	319	0	0	0	62	0	87	113	171	96	625	52	0	1	0
Hai	HEG 29	H151-29-2	spring	no	6393	5947	0	2573	682	0	2056	344	81	769	663	1	0	575	0	0	1	0	262	0	0	1	0	0	0	0	109	0	0	0	214	1	0	0	1035	1	118	0	0	0	0	0	0	0	0
Hai	HEG 30	H151-30-15	spring	yes	11142	2147	1	3873	1686	115	2730	299	1311	2346	474	216	1301	2225	2	1	2169	0	1090	433	0	2	15	21	19	0	195	6	159	86	569	0	0	0	3	0	0	46	676	192	325	0	0	67	1
Hai	HEG 30	H151-30-14	spring	no	15618	4937	7	12827	5642	78	7599	568	2152	4884	711	251	1515	1529	0	114	1006	1	4991	49	0	196	68	0	145	22	326	1	0	795	21	0	0	0	67	0	0	306	252	1475	348	0	12	0	0
Hai	HEG 34	H151-34-10	spring	yes	17179	177	68	3639	4618	51	1344	132	259	1588	2498	26	1456	153	0	83	41	463	550	30	17	190	1553	0	357	0	132	0	0	767	19	6	89	0	0	0	23	98	46	574	208	0	20	1	0
Hai	HEG 34	H151-34-8	spring	no	11256	2408	153	3024	3570	312	826	763	708	900	856	156	792	639	18	90	95	104	1046	94	0	53	155	0	140	0	24	3	15	312	64	0	1830	1	37	1	8	43	99	458	143	0	28	25	0
Hai	HEG 36	H151-36-02	spring	yes	12895	7124	1	1973	902	0	967	2590	1364	973	831	1	196	347	140	0	215	0	100	163	0	0	57	0	0	0	222	207	0	249	0	400	998	0	80	0	0	196	276	0	66	1033	0	40	0
Hai	HEG 36	H151-36-3	spring	no	18279	2795	4	1603	781	2	567	0	734	644	36	0	0	257	1	1	0	0	219	0	0	5	3	0	169	0	354	206	114	1202	0	638	1237	0	181	1	0	29	97	0	1	0	2	0	0
Hai	HEG 40	H151-40-09	spring	yes	4878	4085	127	929	2873	19	1014	822	1325	168	1100	0	1700	1281	0	0	0	267	424	127	1	203	223	0	46	2	198	1	0	0	9374	0	93	0	1	0	309	100	58	62	0	542	0	160	0
Hai	HEG 40	H151-40-6	spring	no	8581	11269	15	1770	1828	379	607	1900	1492	385	1543	188	359	1350	72	193	114	1175	1338	0	0	102	1267	1	256	380	255	0	0	68	773	193	0	1	194	0	221	0	547	0	0	131	0	0	0
Sch	SEG 02	S152-02-1	summer	no	1437	642	55	1159	1429	1966	420	97	14	63	844	801	4	33	1	183	16	13	178	15	0	1093	204	0	331	0	99	0	0	179	0	31	0	23	37	0	19	0	199	443	0	0	92	7	0
Sch	SEG 07	S152-07-01	summer	yes	4744	933	148	2877	2141	2911	270	29	11	412	1806	0	304	75	0	143	39	0	652	0	0	1121	530	0	0	0	318	0	0	0	36	0	0	0	1025	0	0	0	311	0	0	34	2035	0	0
Sch	SEG 07	S152-07-4	summer	no	7160	901	54	1675	4225	403	226	85	0	224	2111	297	49	113	1	44	19	0	705	0	0	66	669	0	59	0	118	0	0	83	0	0	0	1	439	0	0	0	156	15	0	44	2120	0	0
Sch	SEG 09	S152-09-08	summer	yes	4578	4218	9709	320	1933	2960	359	365	19	164	923	21	234	75	224	74	2	1	24	0	1349	0	167	1943	22	0	311	0	0	0	0	45	0	0	339	30	79	0	7	0	0	0	380	0	0
Sch	SEG 09	S152-09-14	summer	no	2920	291	1631	296	631	731	570	29	29	470	42	26	326	184	121	21	0	7	22	0	12576	10	68	6745	219	0	251	0	0	71	0	1	0	0	2	26	0	0	46	25	9	1	299	31	242
Sch	SEG 20	S152-20-04	summer	yes	1805	8422	4467	700	481	2579	119	545	0	2	398	715	2	411	0	459	141	2	0	0	35	0	159	151	0	0	520	2	0	0	0	386	0	0	193	0	0	0	320	0	0	0	149	0	94
Sch	SEG 20	S152-20-1	summer	no	6378	1025	1250	1015	2448	2049	490	196	165	241	240	368	0	1483	0	144	0	12	0	0	0	0	780	262	0	0	1667	29	0	154	2	28	18	0	76	78	0	109	2358	256	0	320	650	38	240
Sch	SEG 21	S152-21-02	summer	yes	3807	11356	3913	712	764	2218	585	358	56	422	492	105	197	41	1	148	36	0	502	0	38	34	198	151	399	0	107	0	0	325	20	0	4	18	612	0	12	0	132	331	0	104	1323	0	0
Sch	SEG 21	S152-21-1	summer	no	5059	5500	11470	1050	832	799	723	102	16	302	774	55	636	114	40	128	133	37	327	2	20	21	242	37	95	0	215	0	0	261	0	5	10	2	50	2	21	6	1983	134	0	25	1109	4	0
Sch	SEG 22	S151-22-41	spring	yes	561	70	1	8296	522	231	36	51	1637	2643	1277	565	509	3418	0	25	1186	18	3906	0	1	29	216	0	181	0	172	0	1	267	0	0	1	0	0	0	1	0	72	0	543	0	0	449	164
Sch	SEG 22	S152-22-01	summer	yes	2892	3771	8	1234	2262	6220	546	539	33	2672	924	57	480	41	6	1121	18	538	1099	0	0	174	79	10	159	0	1273	0	0	26	0	110	0	1	233	43	937	49	75	11	59	101	27	2	0
Sch	SEG 22	S151-22-43	spring	no	0	0	1	0	0	0	2	0	1	0	0	461	0	287	0	1	0	0	538	0	0	785	0	0	0	0	0	0	0	0	0	0	0	0	0	0	0	0	1	0	967	0	0	0	0
Sch	SEG 22	S152-22-9	summer	no	7332	3259	123	2038	4498	6842	182	130	25	10142	134	19	383	39	0	38	11	6	1070	15	16	47	122	0	91	0	779	0	0	30	0	5	0	19	135	260	46	21	72	63	63	0	219	1	20
Sch	SEG 33	S151-33-34	spring	yes	11219	1318	6	915	2453	31	1217	2	2356	251	5691	72	843	3837	1	567	0	0	435	244	44	350	709	12	1115	0	304	0	0	739	67	59	1	0	0	0	299	361	54	240	0	0	156	0	0
Sch	SEG 33	S152-33-03	summer	yes	6154	1007	1163	399	1982	27	441	5191	140	23	2307	7	761	681	3	14	0	6743	163	3	0	14	474	0	85	480	12	19	3	107	27	31	4	7	380	0	1034	0	94	138	0	222	351	5	144
Sch	SEG 33	S151-33-20	spring	no	8855	206	176	273	1816	130	1438	1	1424	0	2742	166	595	315	48	114	0	0	192	46	9592	16	113	0	409	0	0	456	163	196	0	0	184	0	101	114	373	0	49	0	0	0	49	42	119
Sch	SEG 33	S152-33-2	summer	no	9012	4542	261	884	3910	556	99	12730	92	61	1693	19	512	505	0	54	8	534	257	16	1	29	1253	87	71	15	35	0	0	75	0	160	0	5	210	556	1210	8	57	80	0	667	836	21	7
Sch	SEG 35	S152-35-08	summer	yes	778	5892	1	3	364	594	87	1797	2	2	0	0	642	0	0	0	0	2618	2	0	1391	0	126	3730	0	0	280	0	0	0	0	0	0	0	83	0	850	0	0	0	0	133	365	1	0
Sch	SEG 35	S152-35-6	summer	no	989	11162	46	146	911	1647	0	892	106	131	484	0	0	221	0	0	0	71	196	8	578	116	0	2544	0	0	1	0	0	0	0	410	0	73	1210	0	3	0	0	125	0	2222	143	0	0
Sch	SEG 36	S152-36-01	summer	yes	8375	703	175	2463	2272	340	324	387	64	510	1528	58	195	390	62	53	10	13	324	51	0	935	489	0	200	0	48	0	0	60	0	77	295	470	105	0	12	63	436	48	0	15	21	108	89
Sch	SEG 36	S151-36-8	spring	no	2802	152	3	1236	4	1	220	176	2285	0	310	0	0	557	296	0	1	1	1	4328	0	753	23	0	453	1	0	576	148	91	1	0	0	0	1	0	0	0	183	1	0	0	0	2881	0
Sch	SEG 36	S152-36-5	summer	no	2587	323	1	420	774	189	86	33	11	368	168	0	60	4	0	38	1	0	207	4	0	25	38	1	45	1	19	0	0	28	0	7	6	72	13	0	33	48	32	12	0	6	3	1	1
Sch	SEG 37	S151-37-37	spring	yes	6475	333	2	2	932	2	1	3	0	6221	715	0	1	1	0	0	0	0	1165	0	0	916	0	0	0	0	2479	15192	0	0	1	1	352	0	0	0	0	1	521	0	0	0	0	0	0
Sch	SEG 37	S152-37-05	summer	yes	1621	10403	112	155	463	2258	778	1514	1	1	494	0	0	24	2101	444	2	1116	1	0	70	33	29	0	32	102	465	0	0	1	0	362	35	1	1138	582	263	0	8	26	0	242	58	0	0
Sch	SEG 37	S151-37-21	spring	no	9737	1036	1	1249	547	137	1914	333	1134	35	1749	71	1228	3080	69	35	428	20	0	272	0	0	215	0	1117	0	71	26	73	1492	0	0	0	0	96	0	0	0	0	70	0	1	0	190	173
Sch	SEG 37	S152-37-8	summer	no	2561	3290	10	398	483	3174	715	222	11	551	139	1	64	63	74	1133	27	274	126	8	1	6	78	1	69	1	334	0	0	173	0	102	3	6	120	689	247	1	37	3	3	36	70	6	0
Sch	SEG 38	S151-38-30	spring	yes	9412	433	3	909	330	4	730	150	281	1	3832	207	4167	1556	4	0	476	1	0	1	0	2140	1579	151	699	0	0	0	0	0	0	1	0	0	1	1	0	0	0	0	0	0	151	179	0
Sch	SEG 38	S151-38-34	spring	no	7631	112	53	598	2122	0	636	37	1511	2	2066	2	2127	1289	24	89	0	103	0	158	482	451	240	0	984	0	0	0	0	171	0	0	0	0	0	0	0	0	0	80	2	0	0	0	0
Sch	SEG 39	S151-39-23	spring	yes	7189	960	1	3	1432	1	1675	0	1614	829	2015	642	1995	0	0	1	840	476	0	660	0	1	15	0	845	0	1	1273	0	1101	0	0	0	0	904	0	0	0	0	0	0	0	0	0	0
Sch	SEG 39	S151-39-24	spring	no	9000	1871	3	1564	704	33	1559	414	3181	856	1034	3	1444	1075	1	0	51	40	116	1825	1	113	111	0	274	0	1	2	27	1874	399	1	1	0	185	0	16	0	56	189	0	0	1	143	0
Sch	SEG 40	S152-40-18	summer	yes	4798	7495	198	1071	1434	1452	447	1148	52	377	992	44	222	71	23	2109	75	1796	17	0	51	500	371	0	87	0	200	13	0	10	0	74	810	0	472	43	0	7	0	15	0	263	185	0	0
Sch	SEG 40	S151-40-23	spring	yes	7211	459	2251	5	2303	1136	6	3	847	2	1540	2649	1792	6	0	1	855	0	0	3	0	2789	0	962	1958	0	0	0	1195	1	0	0	0	0	606	0	0	1	0	0	0	1	0	0	0
Sch	SEG 40	S152-40-13	summer	no	4800	1512	1921	1645	2400	975	792	657	13	130	1267	13	271	85	11	1567	26	6785	133	1	0	45	354	18	62	0	320	0	0	6	0	38	0	6	357	87	61	9	259	63	0	100	788	1	0
Sch	SEG 40	S151-40-28	spring	no	666	1416	0	442	268	78	2	306	1296	496	501	214	741	1394	0	224	2	1	0	0	268	266	186	0	172	0	0	376	99	0	732	85	0	1	0	0	0	0	11	0	0	0	0	0	0
Sch	SEG 42	S151-42-10	spring	yes	7272	416	3017	1523	227	0	322	629	323	48	1434	280	0	2957	4236	125	0	53	16	590	0	0	1237	1	1734	0	0	56	41	135	0	0	0	0	0	2	0	0	166	95	0	0	15	1296	245
Sch	SEG 42	S151-42-20	spring	no	22368	14015	1013	1171	52	3000	2272	370	7639	1216	749	771	1	2820	0	0	535	564	0	4486	0	0	72	0	748	0	0	1174	0	2	0	0	0	0	167	0	0	0	333	646	0	0	0	1602	370
Sch	SEG 43	S152-43-05	summer	yes	1537	15104	66	323	199	646	95	1410	35	107	143	23	138	787	0	127	0	506	22	0	63	46	30	0	0	0	74	0	0	0	0	787	137	24	441	16	22	29	1377	0	0	466	0	130	0
Sch	SEG 43	S152-43-1	summer	no	2599	23457	228	54	893	68	101	1480	0	0	190	4	86	98	0	0	0	818	54	0	0	2	154	59	75	0	0	0	0	0	0	0	0	0	781	50	0	0	23	102	0	691	8	0	0
Sch	SEG 43	S151-43-19	spring	no	9412	203	95	823	457	62	1001	88	5454	77	2595	1474	427	1032	0	27	11	0	499	129	1	481	169	0	785	0	0	395	1047	500	0	0	0	0	60	0	52	0	425	30	1	0	0	667	207
Sch	SEG 44	S152-44-06	summer	yes	6720	9063	157	331	3584	791	294	294	11	64	529	3	71	12	0	373	0	12	21	0	507	5	215	1	31	0	113	0	0	0	0	322	0	16	82	97	70	4	1	10	0	66	111	0	0
Sch	SEG 44	S151-44-07	spring	yes	6827	535	3974	623	127	0	1544	4	1846	0	2313	471	106	995	0	47	48	0	173	117	0	0	42	0	621	36	151	10	399	1892	41	0	0	0	70	0	0	0	0	69	0	0	0	110	0
Sch	SEG 44	S152-44-8	summer	no	9330	3434	931	442	4147	7582	82	911	38	1	382	789	156	0	1	0	0	288	209	0	0	1	46	0	0	0	271	0	0	0	0	177	0	32	10	122	0	0	21	166	0	74	32	0	0
Sch	SEG 44	S151-44-15	spring	no	20311	100	3	3256	1623	66	1969	39	2059	24	4970	1437	65	2471	0	112	23	0	113	67	0	212	575	0	762	1	342	11	0	2549	0	0	1	0	0	0	11	0	99	1	0	39	29	164	969
Sch	SEG 45	S151-45-16	spring	yes	1930	52	41	1942	197	0	2680	0	423	0	762	1554	0	3699	1	332	726	0	341	0	0	2950	1266	0	129	0	36	0	0	64	0	0	0	0	0	0	0	0	62	31	0	1	19	345	0
Sch	SEG 45	S151-45-15	spring	no	4065	371	400	1537	68	1	706	279	4540	25	821	55	0	1672	0	82	265	17	391	104	0	505	212	0	251	1	0	2214	15656	1077	126	0	0	0	0	0	0	51	10	80	0	0	0	322	660
Sch	SEG 46	S152-46-09	summer	yes	2224	3618	3301	397	162	591	1299	660	27	132	264	508	150	853	265	381	1917	590	0	589	139	102	49	1905	241	0	178	0	0	232	0	0	76	0	81	17	70	0	901	72	0	38	28	41	0
Sch	SEG 46	S151-46-04	spring	yes	1968	6	606	1119	1	0	280	1	883	0	1691	2573	0	2435	0	0	356	250	807	0	0	1352	831	0	128	0	0	0	313	0	1	0	0	0	0	0	0	0	128	0	0	1	578	169	741
Sch	SEG 46	S152-46-18	summer	no	5956	869	5760	2694	1602	434	131	1265	379	1	2080	724	530	2546	1236	12	2920	1732	533	146	23	264	1277	185	52	0	9	0	0	29	1	7	19	2	80	82	0	0	219	103	1	49	472	29	0
Sch	SEG 46	S151-46-1	spring	no	12418	335	1	3011	0	0	8964	1	5692	0	4561	3142	0	1279	0	1900	3263	0	0	1	0	0	658	0	1095	0	0	0	3529	1	0	0	0	0	0	0	2	0	1440	0	0	1	0	815	660
Sch	SEG 47	S152-47-11	summer	yes	16276	4560	142	3191	4795	1828	645	1200	113	90	2368	166	243	107	98	156	23	13	221	51	19	261	557	73	296	0	118	13	0	410	0	223	201	16	143	38	159	73	134	75	0	25	80	0	36
Sch	SEG 47	S152-47-5	summer	no	15551	1191	1155	1783	4646	115	223	324	5	0	1709	9	639	104	54	0	23	176	185	0	0	13	142	39	77	0	0	0	0	239	0	19	0	0	283	5	3	0	186	60	0	368	682	0	29
Sch	SEG 47	S151-47-22	spring	no	2236	332	0	83	115	86	306	0	1915	0	99	260	209	1088	0	0	368	0	2	1643	1	330	29	0	294	1	0	384	888	0	3400	0	0	0	0	0	76	303	0	66	0	0	0	266	531
[truncated: 215 more columns]

## Sheet: Taxonomic assignments
OTU_ID	KINGDOM	PHYLUM	CLASS	ORDER	FAMILY	GENUS	SPECIES
OTU1	Fungi	Basidiomycota	Tremellomycetes	Tremellales	Tremellales_fam_Incertae_sedis	Cryptococcus	Cryptococcus_victoriae
OTU2	Fungi	Ascomycota	Dothideomycetes	Capnodiales	Mycosphaerellaceae	Mycosphaerella	Mycosphaerella_tassiana
OTU3	Fungi	Ascomycota	Dothideomycetes	Pleosporales	Didymellaceae	Neoascochyta	Neoascochyta_desmazieri
OTU4	Fungi	Basidiomycota	Tremellomycetes	Tremellales	Tremellales_fam_Incertae_sedis	Cryptococcus	Cryptococcus_sp
OTU5	Fungi	Basidiomycota	Tremellomycetes	Filobasidiales	Filobasidiaceae	Filobasidium	Filobasidium_stepposum
OTU6	Fungi	Basidiomycota	Microbotryomycetes	Sporidiobolales	Sporidiobolales_fam_Incertae_sedis	Sporobolomyces	Sporobolomyces_roseus
OTU7	Fungi	Basidiomycota	Tremellomycetes	Tremellales	Tremellales_fam_Incertae_sedis	Bullera	Bullera_crocea
OTU8	Fungi	Ascomycota	Dothideomycetes	Capnodiales	unidentified	unidentified	Capnodiales_sp
OTU9	Fungi	Ascomycota	Leotiomycetes	Helotiales	Helotiales_fam_Incertae_sedis	Helgardia	Helgardia_sp
OTU10	Fungi	Basidiomycota	Tremellomycetes	Tremellales	Tremellales_fam_Incertae_sedis	Dioszegia	Dioszegia_fristingensis
OTU11	Fungi	Basidiomycota	unidentified	unidentified	unidentified	unidentified	Basidiomycota_sp
OTU12	Fungi	Ascomycota	Sordariomycetes	Xylariales	Xylariales_fam_Incertae_sedis	Monographella	Monographella_nivalis
OTU13	Fungi	Basidiomycota	Tremellomycetes	unidentified	unidentified	unidentified	Tremellomycetes_sp
OTU14	Fungi	Ascomycota	Leotiomycetes	Helotiales	Helotiaceae	Articulospora	Articulospora_sp
OTU15	Fungi	unidentified	unidentified	unidentified	unidentified	unidentified	Fungi_sp
OTU16	Fungi	Basidiomycota	Tremellomycetes	Cystofilobasidiales	Cystofilobasidiaceae	Itersonilia	Itersonilia_pannonica
OTU17	Fungi	Ascomycota	Dothideomycetes	Capnodiales	unidentified	unidentified	Capnodiales_sp
OTU18	Fungi	Ascomycota	Dothideomycetes	Pleosporales	Pleosporales_fam_Incertae_sedis	Boeremia	Boeremia_noackiana
OTU19	Fungi	Basidiomycota	Tremellomycetes	Tremellales	Tremellales_fam_Incertae_sedis	Cryptococcus	Cryptococcus_victoriae
OTU20	Fungi	Ascomycota	Pezizomycotina_cls_Incertae_sedis	Pezizomycotina_ord_Incertae_sedis	Pezizomycotina_fam_Incertae_sedis	Volucrispora	Volucrispora_graminea
OTU21	Fungi	unidentified	unidentified	unidentified	unidentified	unidentified	Fungi_sp
OTU22	Fungi	Basidiomycota	Tremellomycetes	Cystofilobasidiales	Cystofilobasidiales_fam_Incertae_sedis	Mrakiella	Mrakiella_aquatica
OTU23	Fungi	Basidiomycota	Tremellomycetes	Cystofilobasidiales	Cystofilobasidiaceae	Cystofilobasidium	Cystofilobasidium_macerans
OTU24	Fungi	Ascomycota	Dothideomycetes	Pleosporales	Sporormiaceae	Preussia	Preussia_persica
OTU25	Fungi	Basidiomycota	Microbotryomycetes	Leucosporidiales	Leucosporidiaceae	Leucosporidium	Leucosporidium_golubevii
OTU26	Fungi	Ascomycota	Dothideomycetes	Pleosporales	Pleosporales_fam_Incertae_sedis	Stagonosporopsis	Stagonosporopsis_actaeae
OTU27	Fungi	Basidiomycota	Tremellomycetes	Tremellales	Tremellales_fam_Incertae_sedis	Dioszegia	Dioszegia_hungarica
OTU28	Fungi	Ascomycota	Dothideomycetes	Pleosporales	Phaeosphaeriaceae	Phaeosphaeria	Phaeosphaeria_sp
OTU29	Fungi	Ascomycota	Leotiomycetes	Helotiales	Hyaloscyphaceae	Rodwayella	Rodwayella_citrinula
OTU30	Fungi	Basidiomycota	Tremellomycetes	Tremellales	Tremellales_fam_Incertae_sedis	Dioszegia	Dioszegia_rishiriensis
OTU31	Fungi	Ascomycota	unidentified	unidentified	unidentified	unidentified	Ascomycota_sp
OTU32	Fungi	Ascomycota	Dothideomycetes	Pleosporales	Pleosporaceae	Epicoccum	Epicoccum_nigrum
OTU33	Fungi	Ascomycota	Dothideomycetes	unidentified	unidentified	unidentified	Dothideomycetes_sp
OTU34	Fungi	Basidiomycota	Microbotryomycetes	Sporidiobolales	Sporidiobolales_fam_Incertae_sedis	Sporobolomyces	Sporobolomyces_phaffii
OTU35	Fungi	Ascomycota	Dothideomycetes	Pleosporales	Pleosporaceae	Alternaria	Alternaria_infectoria
OTU36	Fungi	Ascomycota	Sordariomycetes	Hypocreales	unidentified	unidentified	Hypocreales_sp
OTU37	Fungi	Ascomycota	Dothideomycetes	Pleosporales	Pleosporales_fam_Incertae_sedis	Didymella	Didymella_protuberans
OTU38	Fungi	Basidiomycota	Tremellomycetes	Tremellales	Tremellales_fam_Incertae_sedis	Dioszegia	Dioszegia_butyracea
OTU39	Fungi	Ascomycota	unidentified	unidentified	unidentified	unidentified	Ascomycota_sp
OTU40	Fungi	Basidiomycota	Tremellomycetes	Tremellales	Tremellales_fam_Incertae_sedis	Dioszegia	Dioszegia_sp
OTU41	Fungi	Basidiomycota	Microbotryomycetes	Leucosporidiales	Leucosporidiaceae	Mastigobasidium	Mastigobasidium_sp
OTU42	Fungi	unidentified	unidentified	unidentified	unidentified	unidentified	Fungi_sp
OTU43	Fungi	Basidiomycota	Tremellomycetes	Filobasidiales	Filobasidiaceae	Filobasidium	Filobasidium_oeirense
OTU44	Fungi	Ascomycota	Leotiomycetes	Helotiales	Hyaloscyphaceae	Cistella	Cistella_albidolutea
OTU45	Fungi	Ascomycota	Dothideomycetes	Pleosporales	Cucurbitariaceae	Pyrenochaetopsis	Pyrenochaetopsis_pratorum
OTU46	Fungi	Basidiomycota	Tremellomycetes	Tremellales	unidentified	unidentified	Tremellales_sp
OTU47	Fungi	Basidiomycota	Tremellomycetes	Filobasidiales	Filobasidiaceae	Filobasidium	Filobasidium_wieringae
OTU48	Fungi	Basidiomycota	Microbotryomycetes	Leucosporidiales	Leucosporidiaceae	Leucosporidium	Leucosporidium_sp
OTU49	Fungi	Basidiomycota	Microbotryomycetes	Leucosporidiales	unidentified	unidentified	Leucosporidiales_sp
OTU50	Fungi	Ascomycota	unidentified	unidentified	unidentified	unidentified	Ascomycota_sp
OTU51	Fungi	Ascomycota	unidentified	unidentified	unidentified	unidentified	Ascomycota_sp
OTU52	Fungi	Ascomycota	Sordariomycetes	Hypocreales	Ophiocordycipitaceae	Ophiocordyceps	Ophiocordyceps_sinensis
OTU53	Fungi	Ascomycota	Sordariomycetes	Sordariomycetidae_ord_Incertae_sedis	Glomerellaceae	Colletotrichum	Colletotrichum_sp
OTU54	Fungi	Ascomycota	Dothideomycetes	Pleosporales	Cucurbitariaceae	Pyrenochaetopsis	Pyrenochaetopsis_leptospora
OTU55	Fungi	Basidiomycota	Cystobasidiomycetes	unidentified	unidentified	unidentified	Cystobasidiomycetes_sp
OTU56	Fungi	Ascomycota	Dothideomycetes	Pleosporales	Pleosporales_fam_Incertae_sedis	Pyrenochaeta	Pyrenochaeta_sp
OTU57	Fungi	Ascomycota	Sordariomycetes	Hypocreales	Clavicipitaceae	Neotyphodium	Neotyphodium_tembladerae
OTU58	Fungi	Basidiomycota	Microbotryomycetes	Sporidiobolales	Sporidiobolales_fam_Incertae_sedis	Sporobolomyces	Sporobolomyces_sp
OTU59	Fungi	unidentified	unidentified	unidentified	unidentified	unidentified	Fungi_sp
OTU60	Fungi	Ascomycota	Dothideomycetes	Dothideomycetes_ord_Incertae_sedis	Dothideomycetes_fam_Incertae_sedis	Zymoseptoria	Zymoseptoria_brevis
OTU61	Fungi	Ascomycota	Dothideomycetes	Pleosporales	Didymellaceae	Neoascochyta	Neoascochyta_exitialis
OTU62	Fungi	Ascomycota	Sordariomycetes	Hypocreales	Nectriaceae	Calonectria	Calonectria_citri
OTU63	Fungi	Ascomycota	Sordariomycetes	Hypocreales	unidentified	unidentified	Hypocreales_sp
OTU64	Fungi	Basidiomycota	Microbotryomycetes	Microbotryales	Ustilentylomataceae	Ustilentyloma	Ustilentyloma_graminis
OTU65	Fungi	Ascomycota	Sordariomycetes	Hypocreales	Hypocreales_fam_Incertae_sedis	Acremonium	Acremonium_sp
OTU66	Fungi	Basidiomycota	Tremellomycetes	Tremellales	Tremellales_fam_Incertae_sedis	Cryptococcus	Cryptococcus_dimennae
OTU67	Fungi	Ascomycota	unidentified	unidentified	unidentified	unidentified	Ascomycota_sp
OTU68	Fungi	unidentified	unidentified	unidentified	unidentified	unidentified	Fungi_sp
OTU69	Fungi	Ascomycota	Sordariomycetes	Hypocreales	Clavicipitaceae	unidentified	Clavicipitaceae_sp
OTU70	Fungi	Ascomycota	Dothideomycetes	Capnodiales	Mycosphaerellaceae	Septoria	Septoria_glycinicola
OTU71	Fungi	Ascomycota	Leotiomycetes	Helotiales	Helotiaceae	Articulospora	Articulospora_sp
OTU72	Fungi	unidentified	unidentified	unidentified	unidentified	unidentified	Fungi_sp
OTU73	Fungi	Ascomycota	Dothideomycetes	Pleosporales	unidentified	unidentified	Pleosporales_sp
OTU74	Fungi	Ascomycota	Dothideomycetes	Capnodiales	Mycosphaerellaceae	Ramularia	Ramularia_collo-cygni
OTU75	Fungi	Basidiomycota	Wallemiomycetes	Wallemiales	Wallemiaceae	Wallemia	Wallemia_mellicola
OTU76	Fungi	unidentified	unidentified	unidentified	unidentified	unidentified	Fungi_sp
OTU77	Fungi	Ascomycota	Sordariomycetes	Hypocreales	Nectriaceae	Fusarium	Fusarium_sp
OTU78	Fungi	Ascomycota	Leotiomycetes	Helotiales	Hyaloscyphaceae	Rodwayella	Rodwayella_citrinula
OTU79	Fungi	Ascomycota	Leotiomycetes	Helotiales	Helotiales_fam_Incertae_sedis	Tetracladium	Tetracladium_sp
OTU80	Fungi	Ascomycota	Leotiomycetes	Helotiales	Helotiales_fam_Incertae_sedis	Oculimacula	Oculimacula_yallundae
OTU81	Fungi	unidentified	unidentified	unidentified	unidentified	unidentified	Fungi_sp
OTU82	Fungi	Basidiomycota	Tremellomycetes	Tremellales	Tremellales_fam_Incertae_sedis	Dioszegia	Dioszegia_hungarica
OTU83	Fungi	Ascomycota	Dothideomycetes	Dothideales	Dothioraceae	Kabatiella	Kabatiella_lini
OTU84	Fungi	Basidiomycota	Tremellomycetes	Tremellales	Bulleribasidiaceae	Vishniacozyma	Vishniacozyma_carnescens
OTU85	Fungi	Ascomycota	Taphrinomycetes	Taphrinales	Protomycetaceae	Protomyces	Protomyces_inouyei
OTU86	Fungi	Ascomycota	Sordariomycetes	Xylariales	Xylariales_fam_Incertae_sedis	Dinemasporium	Dinemasporium_pseudoindicum
OTU87	Fungi	Basidiomycota	Tremellomycetes	Tremellales	Tremellales_fam_Incertae_sedis	Bullera	Bullera_globospora
OTU88	Fungi	Ascomycota	Dothideomycetes	Capnodiales	Mycosphaerellaceae	Septoria	Septoria_arundinacea
OTU89	Fungi	Ascomycota	Dothideomycetes	Pleosporales	Pleosporaceae	Alternaria	Alternaria_rosae
OTU90	Fungi	Ascomycota	Leotiomycetes	Helotiales	Sclerotiniaceae	Botrytis	Botrytis_caroliniana
OTU91	Fungi	Basidiomycota	Tremellomycetes	Filobasidiales	Filobasidiaceae	Filobasidium	Filobasidium_magnum
OTU92	Fungi	Ascomycota	Dothideomycetes	Pleosporales	unidentified	unidentified	Pleosporales_sp
OTU93	Fungi	Ascomycota	Sordariomycetes	Xylariales	Xylariales_fam_Incertae_sedis	Monographella	Monographella_cucumerina
OTU94	Fungi	Ascomycota	Sordariomycetes	Sordariales	Lasiosphaeriaceae	Podospora	Podospora_sp
OTU95	Fungi	Basidiomycota	Agaricostilbomycetes	Agaricostilbales	Kondoaceae	Kondoa	Kondoa_changbaiensis
OTU96	Fungi	Ascomycota	Dothideomycetes	Capnodiales	Davidiellaceae	Cladosporium	Cladosporium_sphaerospermum
OTU97	Fungi	unidentified	unidentified	unidentified	unidentified	unidentified	Fungi_sp
OTU98	Fungi	Ascomycota	Pezizomycetes	Pezizales	Pyronemataceae	Cleistothelebolus	Cleistothelebolus_nipigonensis
OTU99	Fungi	Ascomycota	Dothideomycetes	Pleosporales	Didymellaceae	Calophoma	Calophoma_complanata
OTU100	Fungi	Basidiomycota	Microbotryomycetes	Sporidiobolales	Sporidiobolales_fam_Incertae_sedis	Sporobolomyces	Sporobolomyces_sp
OTU101	Fungi	Ascomycota	Leotiomycetes	Helotiales	Helotiales_fam_Incertae_sedis	unidentified	Helotiales_fam_Incertae_sedis_sp
OTU102	Fungi	unidentified	unidentified	unidentified	unidentified	unidentified	Fungi_sp
OTU103	Fungi	Chytridiomycota	Chytridiomycetes	Rhizophlyctidales	Rhizophlyctidaceae	Rhizophlyctis	Rhizophlyctis_rosea
OTU104	Fungi	Basidiomycota	Tremellomycetes	Tremellales	Tremellales_fam_Incertae_sedis	Cryptococcus	Cryptococcus_victoriae
OTU105	Fungi	Basidiomycota	Ustilaginomycotina_cls_Incertae_sedis	Malasseziales	Malasseziaceae	Malassezia	Malassezia_restricta
OTU106	Fungi	Basidiomycota	Microbotryomycetes	Leucosporidiales	Leucosporidiaceae	Leucosporidium	Leucosporidium_sp
OTU107	Fungi	Ascomycota	Dothideomycetes	Pleosporales	unidentified	unidentified	Pleosporales_sp
OTU108	Fungi	Basidiomycota	Tremellomycetes	unidentified	unidentified	unidentified	Tremellomycetes_sp
OTU109	Fungi	Ascomycota	Sordariomycetes	Xylariales	Xylariales_fam_Incertae_sedis	Microdochium	Microdochium_phragmitis
OTU110	Fungi	Ascomycota	Sordariomycetes	Xylariales	Xylariales_fam_Incertae_sedis	Dinemasporium	Dinemasporium_morbidum
OTU111	Fungi	Ascomycota	Dothideomycetes	Pleosporales	unidentified	unidentified	Pleosporales_sp
OTU112	Fungi	Ascomycota	Dothideomycetes	unidentified	unidentified	unidentified	Dothideomycetes_sp
OTU113	Fungi	Ascomycota	Taphrinomycetes	Taphrinales	Protomycetaceae	Protomyces	Protomyces_inouyei
OTU114	Fungi	Basidiomycota	Exobasidiomycetes	unidentified	unidentified	unidentified	Exobasidiomycetes_sp
OTU115	Fungi	Ascomycota	Sordariomycetes	Xylariales	Xylariales_fam_Incertae_sedis	Phomatospora	Phomatospora_dinemasporium
OTU116	Fungi	Basidiomycota	Tremellomycetes	Cystofilobasidiales	unidentified	unidentified	Cystofilobasidiales_sp
OTU117	Fungi	Ascomycota	Dothideomycetes	Capnodiales	Mycosphaerellaceae	unidentified	Mycosphaerellaceae_sp
OTU118	Fungi	Basidiomycota	Microbotryomycetes	Sporidiobolales	Sporidiobolales_fam_Incertae_sedis	Rhodotorula	Rhodotorula_babjevae
OTU119	Fungi	Ascomycota	Leotiomycetes	Helotiales	unidentified	unidentified	Helotiales_sp
OTU120	Fungi	Ascomycota	Leotiomycetes	Helotiales	Helotiales_fam_Incertae_sedis	Scytalidium	Scytalidium_sp
OTU121	Fungi	Ascomycota	Dothideomycetes	Pleosporales	Pleosporales_fam_Incertae_sedis	unidentified	Pleosporales_fam_Incertae_sedis_sp
OTU122	Fungi	Ascomycota	unidentified	unidentified	unidentified	unidentified	Ascomycota_sp
OTU123	No blast hit	No blast hit	No blast hit	No blast hit	No blast hit	No blast hit	No blast hit
OTU124	Fungi	Ascomycota	Leotiomycetes	Helotiales	unidentified	unidentified	Helotiales_sp
OTU125	Fungi	Basidiomycota	Microbotryomycetes	Leucosporidiales	Leucosporidiaceae	Leucosporidium	Leucosporidium_sp
OTU126	Fungi	Ascomycota	Sordariomycetes	Hypocreales	unidentified	unidentified	Hypocreales_sp
OTU127	Fungi	unidentified	unidentified	unidentified	unidentified	unidentified	Fungi_sp
OTU128	Fungi	Ascomycota	unidentified	unidentified	unidentified	unidentified	Ascomycota_sp
OTU129	No blast hit	No blast hit	No blast hit	No blast hit	No blast hit	No blast hit	No blast hit
OTU130	Fungi	Basidiomycota	Agaricomycetes	Agaricales	Agaricaceae	Coprinus	Coprinus_foetidellus
OTU131	Fungi	Basidiomycota	Microbotryomycetes	Sporidiobolales	Sporidiobolales_fam_Incertae_sedis	Rhodotorula	Rhodotorula_fragaria
OTU132	Fungi	Basidiomycota	Microbotryomycetes	Sporidiobolales	unidentified	unidentified	Sporidiobolales_sp
OTU133	Fungi	Basidiomycota	Agaricostilbomycetes	Agaricostilbales	Agaricostilbaceae	Bensingtonia	Bensingtonia_sp
OTU134	Fungi	unidentified	unidentified	unidentified	unidentified	unidentified	Fungi_sp
OTU135	Fungi	Ascomycota	Dothideomycetes	Capnodiales	Davidiellaceae	Cladosporium	Cladosporium_velox
OTU136	Fungi	Ascomycota	Eurotiomycetes	Chaetothyriales	Herpotrichiellaceae	Exophiala	Exophiala_sp
OTU137	Fungi	Basidiomycota	unidentified	unidentified	unidentified	unidentified	Basidiomycota_sp
OTU138	Fungi	Basidiomycota	Tremellomycetes	Filobasidiales	Filobasidiaceae	Filobasidium	Filobasidium_oeirense
OTU139	Fungi	Ascomycota	unidentified	unidentified	unidentified	unidentified	Ascomycota_sp
OTU140	Fungi	Ascomycota	Sordariomycetes	Xylariales	Xylariales_fam_Incertae_sedis	Dinemasporium	Dinemasporium_japonicum
OTU141	Fungi	Ascomycota	Sordariomycetes	Sordariales	Sordariaceae	Neurospora	Neurospora_terricola
OTU142	Fungi	Basidiomycota	Tremellomycetes	Cystofilobasidiales	Cystofilobasidiaceae	Cystofilobasidium	Cystofilobasidium_macerans
OTU143	Fungi	Ascomycota	Dothideomycetes	unidentified	unidentified	unidentified	Dothideomycetes_sp
OTU144	Fungi	Ascomycota	Dothideomycetes	Dothideomycetes_ord_Incertae_sedis	Dothideomycetes_fam_Incertae_sedis	Zymoseptoria	Zymoseptoria_brevis
OTU145	Fungi	Basidiomycota	Tremellomycetes	Tremellales	Tremellales_fam_Incertae_sedis	unidentified	Tremellales_fam_Incertae_sedis_sp
OTU146	Fungi	Ascomycota	Eurotiomycetes	Eurotiales	Trichocomaceae	Penicillium	Penicillium_bialowiezense
OTU147	Fungi	Basidiomycota	Agaricomycetes	Agaricales	unidentified	unidentified	Agaricales_sp
OTU148	Fungi	Ascomycota	Sordariomycetes	Sordariales	unidentified	unidentified	Sordariales_sp
OTU149	Fungi	Ascomycota	Sordariomycetes	Hypocreales	unidentified	unidentified	Hypocreales_sp
OTU150	Fungi	Ascomycota	Dothideomycetes	Pleosporales	unidentified	unidentified	Pleosporales_sp
OTU151	Fungi	Basidiomycota	Microbotryomycetes	Leucosporidiales	Leucosporidiaceae	Mastigobasidium	Mastigobasidium_sp
OTU152	Fungi	Ascomycota	Pezizomycotina_cls_Incertae_sedis	Pezizomycotina_ord_Incertae_sedis	Pezizomycotina_fam_Incertae_sedis	Gyoerffyella	Gyoerffyella_entomobryoides
OTU153	Fungi	Basidiomycota	Cystobasidiomycetes	Cystobasidiomycetes_ord_Incertae_sedis	Symmetrosporaceae	Symmetrospora	Symmetrospora_coprosmae
OTU154	Fungi	Ascomycota	Dothideomycetes	Pleosporales	Diademaceae	Comoclathris	Comoclathris_sedi
OTU155	Fungi	Ascomycota	Leotiomycetes	Helotiales	Hyaloscyphaceae	Trichopezizella	Trichopezizella_otanii
OTU156	Fungi	unidentified	unidentified	unidentified	unidentified	unidentified	Fungi_sp
OTU157	Fungi	Ascomycota	Dothideomycetes	Capnodiales	unidentified	unidentified	Capnodiales_sp
OTU158	Fungi	Ascomycota	unidentified	unidentified	unidentified	unidentified	Ascomycota_sp
OTU159	Fungi	Basidiomycota	Tremellomycetes	Tremellales	unidentified	unidentified	Tremellales_sp
OTU160	Fungi	unidentified	unidentified	unidentified	unidentified	unidentified	Fungi_sp
OTU161	Fungi	Basidiomycota	Ustilaginomycotina_cls_Incertae_sedis	Malasseziales	Malasseziaceae	Malassezia	Malassezia_sympodialis
OTU162	Fungi	Ascomycota	Sordariomycetes	Hypocreales	Hypocreales_fam_Incertae_sedis	Myrothecium	Myrothecium_gramineum
OTU163	Fungi	Ascomycota	Leotiomycetes	Erysiphales	Erysiphaceae	Blumeria	Blumeria_graminis
OTU164	Fungi	Ascomycota	Pezizomycotina_cls_Incertae_sedis	Pezizomycotina_ord_Incertae_sedis	Pezizomycotina_fam_Incertae_sedis	Volucrispora	Volucrispora_graminea
OTU165	Fungi	Ascomycota	Eurotiomycetes	Chaetothyriales	Chaetothyriaceae	Cyphellophora	Cyphellophora_pauciseptata
OTU166	Fungi	Ascomycota	Leotiomycetes	Helotiales	Helotiales_fam_Incertae_sedis	Tetracladium	Tetracladium_sp
OTU167	Fungi	Ascomycota	Dothideomycetes	Pleosporales	Pleosporales_fam_Incertae_sedis	Mycocentrospora	Mycocentrospora_acerina
OTU168	Fungi	Basidiomycota	Tremellomycetes	Cystofilobasidiales	Cystofilobasidiaceae	Udeniomyces	Udeniomyces_pyricola
OTU169	Fungi	Basidiomycota	Agaricomycetes	Agaricales	Psathyrellaceae	Coprinopsis	Coprinopsis_radiata
OTU170	Fungi	Ascomycota	Dothideomycetes	Pleosporales	unidentified	unidentified	Pleosporales_sp
OTU171	Fungi	Ascomycota	Eurotiomycetes	Chaetothyriales	Herpotrichiellaceae	unidentified	Herpotrichiellaceae_sp
OTU172	Fungi	Ascomycota	Dothideomycetes	Capnodiales	Mycosphaerellaceae	Dissoconium	Dissoconium_eucalypti
OTU173	Fungi	Ascomycota	unidentified	unidentified	unidentified	unidentified	Ascomycota_sp
OTU174	Fungi	unidentified	unidentified	unidentified	unidentified	unidentified	Fungi_sp
OTU175	Fungi	unidentified	unidentified	unidentified	unidentified	unidentified	Fungi_sp
OTU176	Fungi	Ascomycota	Dothideomycetes	unidentified	unidentified	unidentified	Dothideomycetes_sp
OTU177	Fungi	Ascomycota	Dothideomycetes	Capnodiales	Mycosphaerellaceae	Sphaerulina	Sphaerulina_amelanchier
OTU178	Fungi	Ascomycota	Sordariomycetes	Hypocreales	unidentified	unidentified	Hypocreales_sp
OTU179	Fungi	Basidiomycota	Exobasidiomycetes	Entylomatales	unidentified	unidentified	Entylomatales_sp
OTU180	Fungi	Ascomycota	Dothideomycetes	Pleosporales	unidentified	unidentified	Pleosporales_sp
OTU181	Fungi	Ascomycota	Sordariomycetes	Sordariales	Lasiosphaeriaceae	unidentified	Lasiosphaeriaceae_sp
OTU182	Fungi	unidentified	unidentified	unidentified	unidentified	unidentified	Fungi_sp
OTU183	Fungi	Ascomycota	Dothideomycetes	Pleosporales	Pleosporales_fam_Incertae_sedis	Phoma	Phoma_schachtii
OTU184	Fungi	Ascomycota	Leotiomycetes	Helotiales	Helotiales_fam_Incertae_sedis	Leptodontidium	Leptodontidium_sp
OTU185	Fungi	Ascomycota	Leotiomycetes	Helotiales	Helotiales_fam_Incertae_sedis	Oculimacula	Oculimacula_yallundae
OTU186	No blast hit	No blast hit	No blast hit	No blast hit	No blast hit	No blast hit	No blast hit
OTU187	Fungi	Basidiomycota	Tremellomycetes	Filobasidiales	Filobasidiaceae	Filobasidium	Filobasidium_magnum
OTU188	Fungi	Basidiomycota	Exobasidiomycetes	unidentified	unidentified	unidentified	Exobasidiomycetes_sp
OTU189	Fungi	Basidiomycota	Tremellomycetes	Tremellales	Tremellales_fam_Incertae_sedis	Naganishia	Naganishia_adeliensis
OTU190	Fungi	Basidiomycota	Tremellomycetes	Tremellales	Tremellales_fam_Incertae_sedis	Cryptococcus	Cryptococcus_sp
OTU191	Fungi	Basidiomycota	Microbotryomycetes	Microbotryomycetes_ord_Incertae_sedis	Microbotryomycetes_fam_Incertae_sedis	Curvibasidium	Curvibasidium_cygneicollum
OTU192	Fungi	Ascomycota	Dothideomycetes	Pleosporales	unidentified	unidentified	Pleosporales_sp
OTU193	Fungi	Basidiomycota	Tremellomycetes	Tremellales	Tremellales_fam_Incertae_sedis	Dioszegia	Dioszegia_rishiriensis
OTU194	Fungi	Basidiomycota	Microbotryomycetes	Leucosporidiales	Leucosporidiaceae	Leucosporidium	Leucosporidium_sp
OTU195	Fungi	Ascomycota	Dothideomycetes	Pleosporales	Phaeosphaeriaceae	unidentified	Phaeosphaeriaceae_sp
OTU196	Fungi	Ascomycota	Saccharomycetes	Saccharomycetales	Saccharomycetales_fam_Incertae_sedis	Debaryomyces	Debaryomyces_hansenii
OTU197	Fungi	Basidiomycota	Microbotryomycetes	Leucosporidiales	Leucosporidiaceae	Mastigobasidium	Mastigobasidium_sp
OTU198	Fungi	Basidiomycota	Tremellomycetes	Tremellales	Tremellales_fam_Incertae_sedis	Bullera	Bullera_unica
OTU199	Fungi	Ascomycota	Dothideomycetes	Dothideomycetes_ord_Incertae_sedis	Dothideomycetes_fam_Incertae_sedis	Zymoseptoria	Zymoseptoria_verkleyi
OTU200	Fungi	Ascomycota	Leotiomycetes	Erysiphales	Erysiphaceae	Blumeria	Blumeria_graminis
OTU201	Fungi	Basidiomycota	Agaricomycetes	Agaricales	Psathyrellaceae	unidentified	Psathyrellaceae_sp
OTU202	Fungi	Ascomycota	Dothideomycetes	Pleosporales	Pleosporaceae	Chalastospora	Chalastospora_ellipsoidea
OTU203	Fungi	Ascomycota	Leotiomycetes	Helotiales	Rutstroemiaceae	unidentified	Rutstroemiaceae_sp
OTU204	Fungi	Ascomycota	Dothideomycetes	Pleosporales	Phaeosphaeriaceae	Phaeosphaeria	Phaeosphaeria_triglochinicola
OTU205	Fungi	Ascomycota	Dothideomycetes	Pleosporales	Leptosphaeriaceae	Leptosphaeria	Leptosphaeria_sp
OTU206	Fungi	Ascomycota	Dothideomycetes	Dothideomycetes_ord_Incertae_sedis	Dothideomycetes_fam_Incertae_sedis	Didymocyrtis	Didymocyrtis_pseudeverniae
OTU207	Fungi	Ascomycota	Dothideomycetes	Pleosporales	Pleosporaceae	unidentified	Pleosporaceae_sp
OTU208	Fungi	Ascomycota	Eurotiomycetes	Chaetothyriales	Chaetothyriaceae	Cyphellophora	Cyphellophora_pauciseptata
OTU209	No blast hit	No blast hit	No blast hit	No blast hit	No blast hit	No blast hit	No blast hit
OTU210	Fungi	Ascomycota	Pezizomycotina_cls_Incertae_sedis	Pezizomycotina_ord_Incertae_sedis	Pezizomycotina_fam_Incertae_sedis	Chaetosphaeronema	Chaetosphaeronema_sp
OTU211	Fungi	Ascomycota	Lecanoromycetes	Lecanorales	Lecanorales_fam_Incertae_sedis	Lecania	Lecania_sp
OTU212	Fungi	Ascomycota	Eurotiomycetes	Eurotiales	Trichocomaceae	Penicillium	Penicillium_paczoskii
OTU213	Fungi	Ascomycota	Sordariomycetes	Xylariales	Diatrypaceae	Diatrypella	Diatrypella_pulvinata
OTU214	Fungi	Ascomycota	Dothideomycetes	Pleosporales	Phaeosphaeriaceae	Stagonospora	Stagonospora_sp
OTU215	Fungi	Ascomycota	Dothideomycetes	Pleosporales	Pleosporales_fam_Incertae_sedis	Pyrenochaeta	Pyrenochaeta_sp
OTU216	Fungi	Ascomycota	Sordariomycetes	Hypocreales	Hypocreales_fam_Incertae_sedis	Myrothecium	Myrothecium_sp
OTU217	Fungi	Basidiomycota	Tremellomycetes	Tremellales	Tremellales_fam_Incertae_sedis	Papiliotrema	Papiliotrema_flavescens
OTU218	No blast hit	No blast hit	No blast hit	No blast hit	No blast hit	No blast hit	No blast hit
OTU219	Fungi	Basidiomycota	Agaricostilbomycetes	Agaricostilbales	unidentified	unidentified	Agaricostilbales_sp
OTU220	Fungi	Ascomycota	Dothideomycetes	Pleosporales	unidentified	unidentified	Pleosporales_sp
OTU221	Fungi	Basidiomycota	Tremellomycetes	Tremellales	unidentified	unidentified	Tremellales_sp
OTU222	Fungi	Ascomycota	Dothideomycetes	Pleosporales	Pleosporaceae	unidentified	Pleosporaceae_sp
OTU223	Fungi	Ascomycota	Leotiomycetes	Helotiales	Hyaloscyphaceae	unidentified	Hyaloscyphaceae_sp
OTU224	Fungi	Ascomycota	Dothideomycetes	Pleosporales	Pleosporales_fam_Incertae_sedis	Pseudocoleophoma	Pseudocoleophoma_calamagrostidis
OTU225	Fungi	unidentified	unidentified	unidentified	unidentified	unidentified	Fungi_sp
OTU226	No blast hit	No blast hit	No blast hit	No blast hit	No blast hit	No blast hit	No blast hit
OTU227	Fungi	Ascomycota	Leotiomycetes	Helotiales	Helotiales_fam_Incertae_sedis	Oculimacula	Oculimacula_yallundae
OTU228	unidentified	unidentified	unidentified	unidentified	unidentified	unidentified
OTU229	Fungi	Ascomycota	Leotiomycetes	Helotiales	unidentified	unidentified	Helotiales_sp
OTU230	Fungi	Ascomycota	Dothideomycetes	Capnodiales	Mycosphaerellaceae	Septoria	Septoria_sp
OTU231	Fungi	Basidiomycota	Tremellomycetes	Tremellales	Tremellales_fam_Incertae_sedis	Bullera	Bullera_sp
OTU232	Fungi	Ascomycota	Eurotiomycetes	Chaetothyriales	Herpotrichiellaceae	unidentified	Herpotrichiellaceae_sp
OTU233	Fungi	Basidiomycota	Cystobasidiomycetes	Cystobasidiomycetes_ord_Incertae_sedis	Buckleyzymaceae	Buckleyzyma	Buckleyzyma_aurantiaca
OTU234	Fungi	unidentified	unidentified	unidentified	unidentified	unidentified	Fungi_sp
OTU235	Fungi	Basidiomycota	Microbotryomycetes	Microbotryales	unidentified	unidentified	Microbotryales_sp
OTU236	Fungi	Basidiomycota	Agaricostilbomycetes	Agaricostilbales	Kondoaceae	Kondoa	Kondoa_changbaiensis
OTU237	Fungi	Basidiomycota	Pucciniomycetes	Pucciniales	Pucciniastraceae	Pucciniastrum	Pucciniastrum_areolatum
OTU238	Fungi	Ascomycota	Sordariomycetes	Xylariales	Amphisphaeriaceae	unidentified	Amphisphaeriaceae_sp
OTU239	Fungi	Ascomycota	Eurotiomycetes	Chaetothyriales	Chaetothyriaceae	Cyphellophora	Cyphellophora_vermispora
OTU240	Fungi	Basidiomycota	Agaricomycetes	Agaricales	Psathyrellaceae	unidentified	Psathyrellaceae_sp
OTU241	Fungi	Ascomycota	Dothideomycetes	Dothideomycetes_ord_Incertae_sedis	Dothideomycetes_fam_Incertae_sedis	Leptospora	Leptospora_rubella
OTU242	No blast hit	No blast hit	No blast hit	No blast hit	No blast hit	No blast hit	No blast hit
OTU243	Fungi	Ascomycota	Dothideomycetes	unidentified	unidentified	unidentified	Dothideomycetes_sp
OTU244	Fungi	Ascomycota	unidentified	unidentified	unidentified	unidentified	Ascomycota_sp
OTU245	Fungi	Ascomycota	Lecanoromycetes	Lecanorales	Lecanorales_fam_Incertae_sedis	Scoliciosporum	Scoliciosporum_chlorococcum
OTU246	Fungi	Ascomycota	unidentified	unidentified	unidentified	unidentified	Ascomycota_sp
OTU247	Fungi	Basidiomycota	Ustilaginomycotina_cls_Incertae_sedis	Malasseziales	Malasseziaceae	Malassezia	Malassezia_globosa
OTU248	Fungi	Basidiomycota	Agaricomycetes	Polyporales	unidentified	unidentified	Polyporales_sp
OTU249	No blast hit	No blast hit	No blast hit	No blast hit	No blast hit	No blast hit	No blast hit
OTU250	Fungi	Ascomycota	Eurotiomycetes	Eurotiales	Trichocomaceae	Penicillium	Penicillium_thymicola
OTU251	Fungi	Ascomycota	Leotiomycetes	Erysiphales	Erysiphaceae	Blumeria	Blumeria_graminis
OTU252	Fungi	Ascomycota	unidentified	unidentified	unidentified	unidentified	Ascomycota_sp
OTU253	No blast hit	No blast hit	No blast hit	No blast hit	No blast hit	No blast hit	No blast hit
OTU254	Fungi	Basidiomycota	Agaricomycetes	Trechisporales	Hydnodontaceae	Subulicystidium	Subulicystidium_perlongisporum
OTU255	Fungi	Ascomycota	Saccharomycetes	Saccharomycetales	Saccharomycetales_fam_Incertae_sedis	Schwanniomyces	Schwanniomyces_polymorphus
OTU256	No blast hit	No blast hit	No blast hit	No blast hit	No blast hit	No blast hit	No blast hit
OTU257	No blast hit	No blast hit	No blast hit	No blast hit	No blast hit	No blast hit	No blast hit
OTU258	Fungi	Ascomycota	unidentified	unidentified	unidentified	unidentified	Ascomycota_sp
OTU259	Fungi	Basidiomycota	Agaricostilbomycetes	Agaricostilbales	Kondoaceae	Kondoa	Kondoa_aeria
